# Supplementary material for: Histone H3 Lys79 methylation is required for efficient nucleotide excision repair in a silenced locus of Saccharomyces cerevisiae
Source: PubMed Central journal article supplement — Nucleic Acids Res. 2009 Jan 20;37(5):1690–700. doi: 10.1093/nar/gkp003 (PMC2655692; doi:10.1093/nar/gkp003), 2009-01-20
Supplement: gkp003_1.pdf [file gkp003_1.pdf]

**Histone H3 Lys79 Methylation is Required for Efficient Nucleotide Excision Repair  
in a Silenced Locus of *Saccharomyces cerevisiae***

Shubho Chaudhuri, John J. Wyrick and Michael J. Smerdon\*

Biochemistry and Biophysics, School of Molecular Biosciences, Washington State

University, Pullman, WA 99164-4660

**Supplemental Table 1: Relative expression<sup>1</sup> of certain NER genes between H3  
K4,79R mutant and *wt* cells**

| S.No | Name of Gene | <i>Fold change</i> <sup>2</sup> |
|------|--------------|---------------------------------|
| 1    | <i>Rad2</i>  | <i>NC</i> <sup>3</sup>          |
| 2    | <i>Rad4</i>  | <i>NC</i>                       |
| 3    | <i>Rad14</i> | <i>NC</i>                       |
| 4    | <i>Rad1</i>  | <i>NC</i>                       |
| 5    | <i>Rad7</i>  | <i>NC</i>                       |
| 6    | <i>Rad10</i> | <i>NC</i>                       |
| 7    | <i>Rad25</i> | <i>NC</i>                       |
| 8    | <i>TFB2</i>  | <i>NC</i>                       |
| 9    | <i>TFB3</i>  | <i>NC</i>                       |
| 10   | <i>TFB1</i>  | <i>NC</i>                       |
| 11   | <i>SSL1</i>  | <i>NC</i>                       |
| 12   | <i>Rad3</i>  | <i>NC</i>                       |
| 13   | <i>Rad26</i> | <i>NC</i>                       |
| 14   | <i>Rad16</i> | <i>NC</i>                       |
| 15   | <i>Rad23</i> | <i>NC</i>                       |

<sup>1</sup> Data in Table 1 were generated from Microarray data accession number GSE6319 (<http://www.ncbi.nlm.nih.gov/geo/>) (17)

<sup>2</sup> Fold change was determined as described in Martin et al, 2004 (25).

<sup>3</sup> NC, no change.

## SUPLIMENTARY FIGURE LIGANDS

**Figure S1: Expression of *HML* $\alpha$ 1, *RPB2* and *GAL10* genes in H3 K79R and H3 K4,79R mutants.** (A) RT-PCR analysis was performed on total RNA from *wt*, H3 K4,79R and H3 K79R cells using primers specific for *RPB2*, *HML* $\alpha$ 1 and *GAL10* gene. The mRNA levels of the *ACT1* gene were used as a loading control. (B) Expression of *HML* $\alpha$ 1 in *wt*/ $\Delta$ sir2 and H3 K4,79R/ $\Delta$  sir2 cells.

**Figure S2. MNase digestion patterns for *GAL10* loci in H3 methylation mutants.** (A) Spheroplasts were isolated from WY139 (*wt*) and methylation mutants, treated with different concentrations of MNase (10 U/ $\mu$ l stock solution) and genomic DNA hybridized with a probe specific for the *GAL10* ORF. (B) Quantitative analysis of MNase accessibility at *GAL10* is expressed as the ratio of mono- to tri-nucleosome signal at different concentrations of MNase.

**Figure S3. NER and MNase accessibility of the *RPB2* locus in Sir2 deletion mutants.** (A) Western blot showing Sir2 levels in *wt* and H3,K4,79R cells. The level of  $\alpha$ -tubulin subunit served as a loading control (lower panel). (B) MNase digestion of WY139 (*wt*) and H3K4,79R mutants. Spheroplasts were isolated, treated with different concentrations of MNase (10 U/ $\mu$ l stock solution) and genomic DNA was isolated, separated by agarose gel electrophoresis, blotted and hybridized with a probe specific for the *RPB2* ORF.

**Figure S4. Nucleotide excision repair at the *HML* locus in *dot1* $\Delta$  and H3 K79G mutants.** Cells were irradiated with 100 J/m<sup>2</sup> UV light and allowed to repair in the dark at 30°C for various times. The time course of CPD removal from the *HML* locus is shown for the H3 K79G mutants (panel A) and the *dot1* $\Delta$  mutant (panels C). Data represent the mean  $\pm$ 1 SD for three independent experiments. To the right of each graph is shown

MNase digestion profiles for *HML* chromatin from the H3 K4,79R mutant (B) and dot1 $\Delta$  mutant (D). Data were obtained as described in legend to Figure 3.

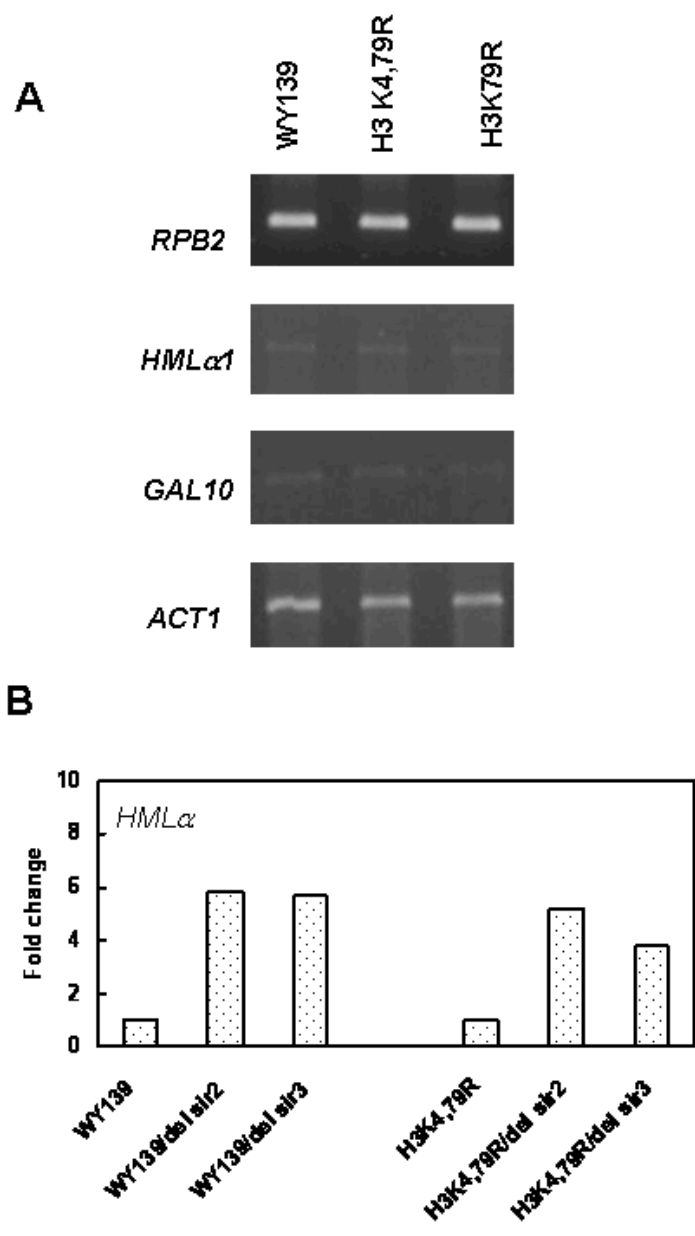

Fig S1

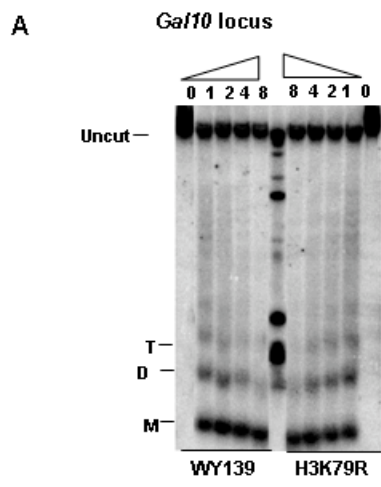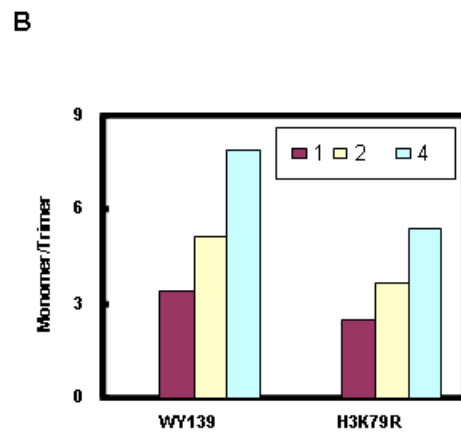

Fig S2

**A**

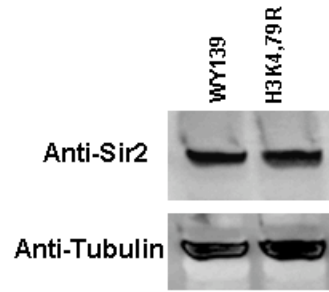

**B**

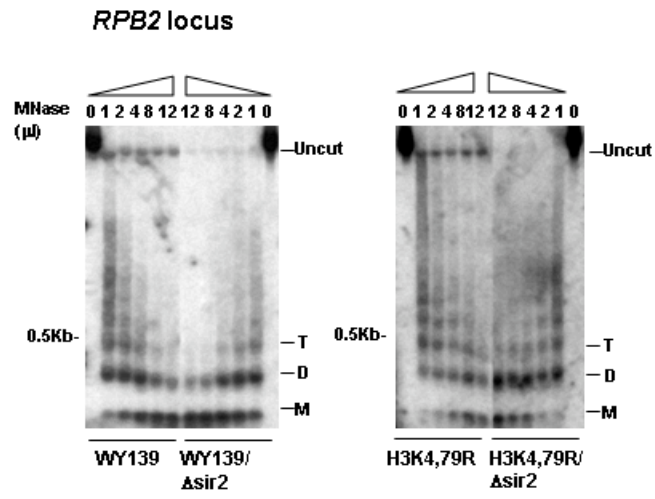

Fig S3

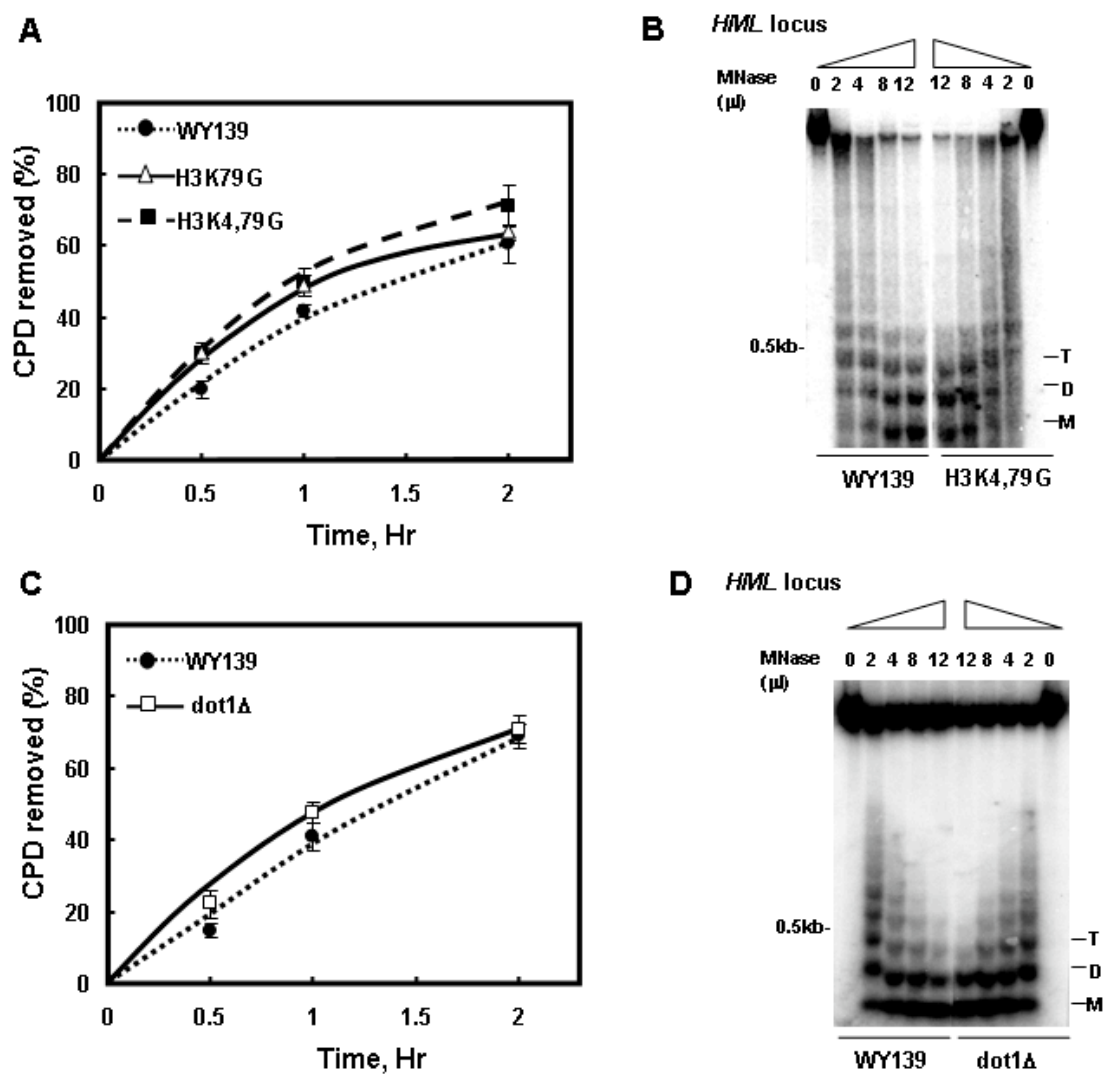

Fig S4
